# Supplementary material for: A Li+-integrated metallohydrogel-based mixed conductive electrochemical semiconductor
Source: Royal Society of Chemistry journal article supplement (doi:10.1039/d1cc05796k), 2021-12-06
Supplement: d1cc05796k1.pdf [file d1cc05796k1.pdf]

Electronic Supplementary Information

**A Li<sup>+</sup>-integrated metallohydrogel based mixed conductive electrochemical semiconductor**

Yeeshu Kumar<sup>a</sup> and Mrigendra Dubey<sup>\*a</sup>

<sup>a</sup>. *Soft Materials Research Laboratory, Department of Metallurgy Engineering and Materials Science, Indian Institute of Technology Indore, Indore 453552, India.*

Email: [mdubey@iiti.ac.in](mailto:mdubey@iiti.ac.in)

---

| <b><u>Table of Contents:</u></b> | <b><u>Pages</u></b> |
|----------------------------------|---------------------|
| <b>EXPERIMENTAL SECTION</b>      |                     |
| Material and physical methods    | S2                  |
| Rheological Study                | S2                  |
| EIS Study                        | S2                  |
| Table S1                         | S3                  |
| Synthesis and Characterization   | S4                  |
| Scheme S1                        | S5                  |
| <b>Supplementary Figures</b>     |                     |
| Figure S1                        | S5                  |
| Figure S2                        | S6                  |
| Figure S3                        | S6                  |
| Figure S4                        | S7                  |
| Figure S5                        | S8                  |
| Figure S6                        | S8                  |
| Figure S7                        | S9                  |
| Figure S8                        | S10                 |
| Figure S9                        | S10                 |
| Figure S10                       | S11                 |
| Figure S11                       | S12                 |
| Figure S12                       | S13                 |
| Figure S13                       | S14                 |
| Figure S14                       | S14                 |
| Figure S15                       | S15                 |
| Figure S16                       | S15                 |
| Figure S17                       | S16                 |

## EXPERIMENTAL SECTION

### Materials and Physical Methods:

Reagents and solvents used in the current research work were procured from Finar Ltd, Ahmedabad, India, S. D. Fine Chem. Ltd, Mumbai, India and used as received without further purification. Methanol was purchased from Advent chembio Pvt. Ltd, Navi Mumbai India. Lithium hydroxide and 5-aminosalicylic acid were procured from Spectrochem Pvt. Ltd., Mumbai (India). Hydrazine hydrate (80%) and  $\text{Cd}(\text{CH}_3\text{COO})_2 \cdot 2\text{H}_2\text{O}$  were purchased from Sisco Research Laboratories Pvt. Ltd. Mumbai (India). Terephthaldehyde was purchased from Sigma-Aldrich.

UV-Vis absorption study was carried on UV2600 Shimadzu spectrophotometer. PerkinElmer's spectrum two spectrometer was used to record FT-IR data.  $^1\text{H}$  NMR spectrum was acquired on a AVANCE III 400 and 500 Ascend Bruker BioSpin International AG spectrometer. Electrospray ionization mass (ESI-MS) spectra were recorded on a Waters (Micromass MS Technologies) QToF Premier. FE-SEM images were captured by JOEL-7610 F Plus. Powder XRD data was recorded on Rigaku SmartLab between angle  $2\theta = 5-60^\circ$ . TGA experiments were performed using PerkinElmer's STA 8000 simultaneous thermal analyser within the temperature range 30-800 °C and scan rate was kept at 5 °C/min.

### FE-SEM sample preparation:

A freshly prepared metallohydrogel (STG) was drop casted on FTO glass substrate and dried at ambient temperature under vacuum for 4 days to obtain dried STG (xerogel). Further, the gold coated STG xerogel sample was mounted to the scanning electron microscope for morphological analysis.

### Rheological Study:

Rheological experiments were carried out with the help of a rheometer MCR 102, Anton Paar equipped with stainless steel parallel plates having dimension 20 mm diameter, 1.0 mm gap. Experiments were conducted on freshly prepared gels (2% w/v). Dynamic amplitude sweep experiments were performed to obtain the linear viscoelastic region (LVR) of the metallohydrogel (STG) by determining the storage modulus ( $G'$ ) and the loss modulus ( $G''$ ) as a function of stress and strain at constant frequency 10 rad/sec, respectively. Dynamic oscillatory frequency sweep was performed at 25 °C (0.1 to 100 rad/sec) at a fixed shear strain of 1%. Time oscillatory strain sweep experiment was conducted at periodic low strain 1% and high strain 100% at constant frequency 10 rad/sec.

### Electrochemical impedance spectroscopic (EIS) measurements

#### Nyquist, Bode impedance plots and Current-voltage characteristic curve

Freshly synthesised metallogel (STG) was casted into a circular shape disc having diameter 1.1 cm and

thickness 0.5 cm. Further, the **STG** disc was sandwiched between two Fluorine-doped Tin Oxide (FTO) electrodes.<sup>1</sup>

Nyquist and Bode impedance plots for **STG** were recorded using a CH instruments CHI604E electrochemical workstation within the frequency range  $10^6$  Hz to  $10^{-2}$  Hz by applying a sinusoidal voltage of 10 mV. The Nyquist plot was fitted with a suitable equivalent electrical circuit model using EIS Analyzer software.<sup>1,2</sup> The obtained parameters value with error have been listed in table-1.

**Table-1:** List of obtained parameters values with % error from fitted equivalent circuit model

| Parameters                      | Obtained values from fitted circuit model | % Error |
|---------------------------------|-------------------------------------------|---------|
| Electronic resistance ( $R_e$ ) | $1.47 \times 10^5 \Omega$                 | 2.97%   |
| Ionic resistance ( $R_i$ )      | $325 \Omega$                              | 2.45%   |
| $CPE_1$                         | $4.94 \times 10^{-9} F.s^n$ , $n = 0.93$  | 4.90%   |
| $CPE_2$                         | $2.35 \times 10^{-6} F.s^n$ , $n = 0.85$  | 2.29%   |

The current voltage characteristics of the **STG** were obtained using a CH instruments CHI604E electrochemical workstation in linear sweep voltammetry mode at a scan rate of 100 mV/sec.<sup>1,3</sup>

#### Ionic and electronic conductivity measurements

The ionic and electronic conductivity of **STG** were measured from the conductivity ( $\sigma$ ) vs frequency plots (Fig. S11). To obtain  $\sigma$  vs frequency plot the  $Z'$  (real component of impedance) vs frequency data were processed by the following equation-

$$\sigma = \frac{1}{R} \cdot \frac{l}{A} \dots \dots \dots (1)$$

Where,  $R$  is resistance of the **STG**,  $l$  is the distance between two electrodes and  $A$  is area of the electrode surface.<sup>1</sup> In  $\sigma$  vs frequency plot, ionic and electronic conductivity of **STG** were measured from high frequency and low frequency plateau, respectively (Fig. S11).<sup>4,5</sup>

Further, the temperature dependent conductivity experiments were performed in a electrochemical cell and temperature in the cell was controlled by IKA ETS-D5 temperature controller attachment.

#### Transport number evaluation

The ionic transport number ( $t_{Li+}$ ) was calculated using the d.c. polarization technique. The electrochemical cell SS| **STG** |SS (SS - stainless steel electrode) was polarized with an applied step potential of 0.75V and resulting current was acquired as a function of time as shown in Fig. S9. The value of  $t_{Li+}$  was calculated using the Vincent–Evans equation:

$$t_{Li+} = \frac{I_s(\Delta V - I_0 R_0)}{I_0(\Delta V - I_s R_s)} \dots \dots \dots (2)$$

Where,  $I_0$  and  $I_s$  are the initial and steady state current, respectively.  $R_0$  and  $R_s$  are the cell resistance before and after polarization experiment obtained with the help of nyquist impedance plot.  $\Delta V$  represents the applied step potential.<sup>5</sup>

### Band gap estimation:

Firstly, diluted metallogel (**STG**) was dropped onto a precleaned FTO glass substrate. Substrate with diluted **STG** was placed on the spin coater (Make- Holmarc, Model no-HO-TH-05) and rotated at 1000 rpm for 300 seconds. A **STG** film was obtained after vacuum drying of the deposited substrate at room temperature for 24 hrs. Further, **STG** film was subjected to UV-vis spectroscopy to obtain absorption spectrum. To estimate band gap ( $E_g$ ), we obtained Tauc's plot by processing UV-vis data with following Tauc's equation-

$$(\alpha h\nu)^2 = (h\nu - E_g) \dots \dots \dots (3)$$

Where,  $\alpha$ ,  $h$ ,  $\nu$  and  $E_g$  represent, absorption coefficient, Planck's constant, frequency of light and optical band gap, respectively.

### Synthesis and characterization:

#### H<sub>4</sub>STL gelator molecule

##### 5,5'-((1E,1'E)-(1,4-phenylenebis(methanylylidene))bis(azanylylidene))bis(2-hydroxybenzoic acid)

A methanolic solution of terephthaldehyde (0.5 g, 3.727 mmol) was added dropwise to a solution of 5-aminosalicylic acid (1.141 g, 7.454 mmol), and the resulting solution refluxed at 65 °C for 8 hours. The black coloured solid compound was precipitated out from the solution which further subsequently washed with methanol and diethyl ether followed by dried under vacuum. Yield 1.3 g (86%). Anal. calcd. for C<sub>22</sub>H<sub>16</sub>N<sub>2</sub>O<sub>6</sub>: C, 65.34; H, 3.99; N, 6.93; Found: C, 65.15; H, 3.70; N, 6.60. <sup>1</sup>H NMR ((CD<sub>3</sub>)<sub>2</sub>SO, 500 MHz,  $\delta_H$ , ppm) 7.04 (d, 2H, Ar-H), 7.61 (d, 2H, Ar-H), 7.78 (d, 2H, Ar-H), 8.06 (s, 4H, Ar-H), 8.78 (s, 2H, -HC=N), 10.09 (s, 2H, -OH), 11.79 (s, 2H, -COOH). <sup>13</sup>C NMR ((CD<sub>3</sub>)<sub>2</sub>SO, 400 MHz,  $\delta$ , ppm) 114.29, 116.31, 117.69, 124.31, 155.07, 172.19, 206.99. ESI-MS  $m/z$ : [H<sub>4</sub>STL.H<sub>2</sub>O], 422.17 (*calcd.* 422.17).

#### Synthesis of metallohydrogel (STG)

H<sub>4</sub>STL (20 mg, 0.049 mmol) was suspended in deionised water (0.5 mL) followed by addition of LiOH.H<sub>2</sub>O (8.30 mg, 0.197 mmol) and subsequent sonication of the mixture resulted in a dark red coloured solution. A freshly prepared Cd(OAc)<sub>2</sub>•2H<sub>2</sub>O (13.18 mg, 0.049 mmol) solution in deionised water (0.5 mL) was added to above solution which upon sonication resulted into a red coloured metallohydrogel (**STG**). The gel formation was primarily confirmed by the inverted vial test method. Anal. calcd. for (C<sub>22</sub>H<sub>12</sub>N<sub>2</sub>O<sub>6</sub>Cd<sub>2</sub>Li<sub>2</sub>•4H<sub>2</sub>O): C, 37.16; H, 2.83; N, 3.94; Found: C, 37.05; H, 2.62; N, 3.80. ESI-MS (diluted gel)  $m/z$ : [(C<sub>22</sub>H<sub>14</sub>N<sub>2</sub>O<sub>6</sub>Cd•H<sub>2</sub>O)+H]<sup>+</sup>, 535.01 (*calcd.* 535.01), [(C<sub>22</sub>H<sub>12</sub>N<sub>2</sub>O<sub>6</sub>Cd<sub>2</sub>•H<sub>2</sub>O•(LiOH)<sub>2</sub>•Na]<sup>+</sup>, 714.91 (*calcd.* 714.91).

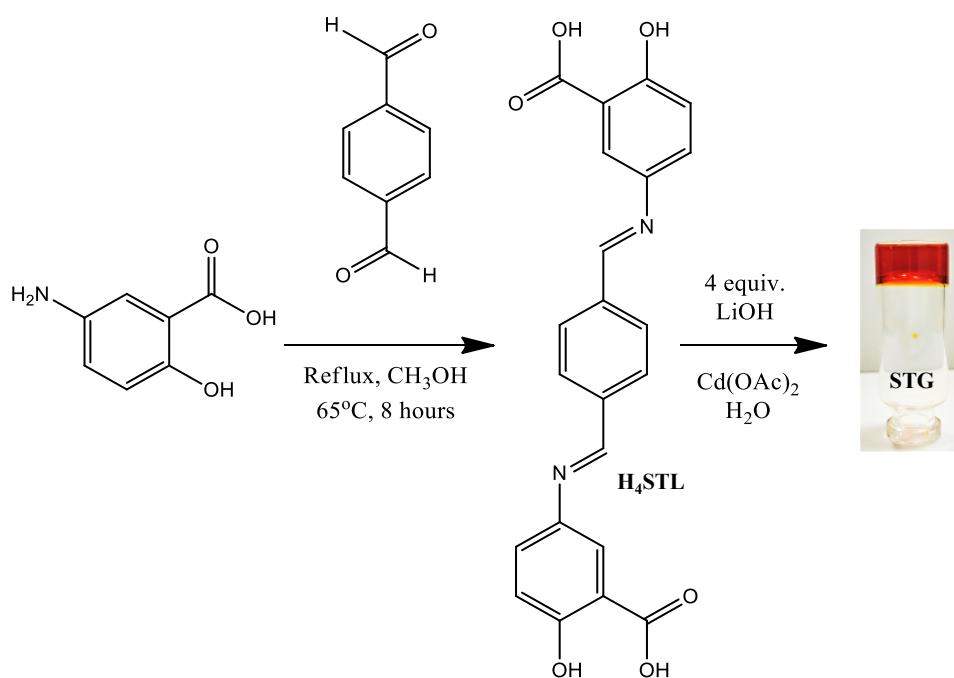

**Scheme S1:** Synthetic route adapted for the synthesis of **H<sub>4</sub>STL** and **STG**.

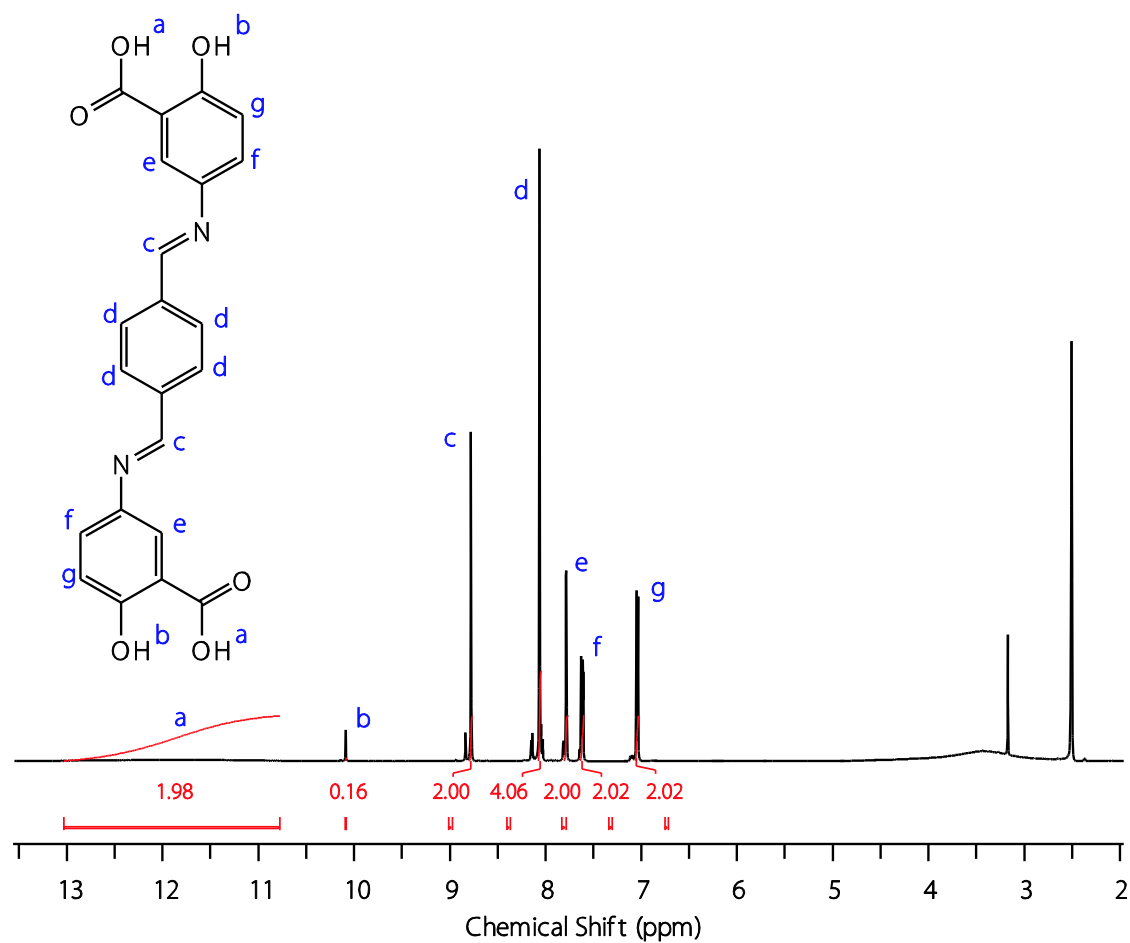

**Figure S1.** <sup>1</sup>H NMR spectrum of **H<sub>4</sub>STL** (DMSO- $d_6$ , 500 MHz)

**Note:** Appearance of the additional peaks adjacent to the aldimine and aromatic protons (b to g) suggest the presence of conformers.<sup>6</sup>

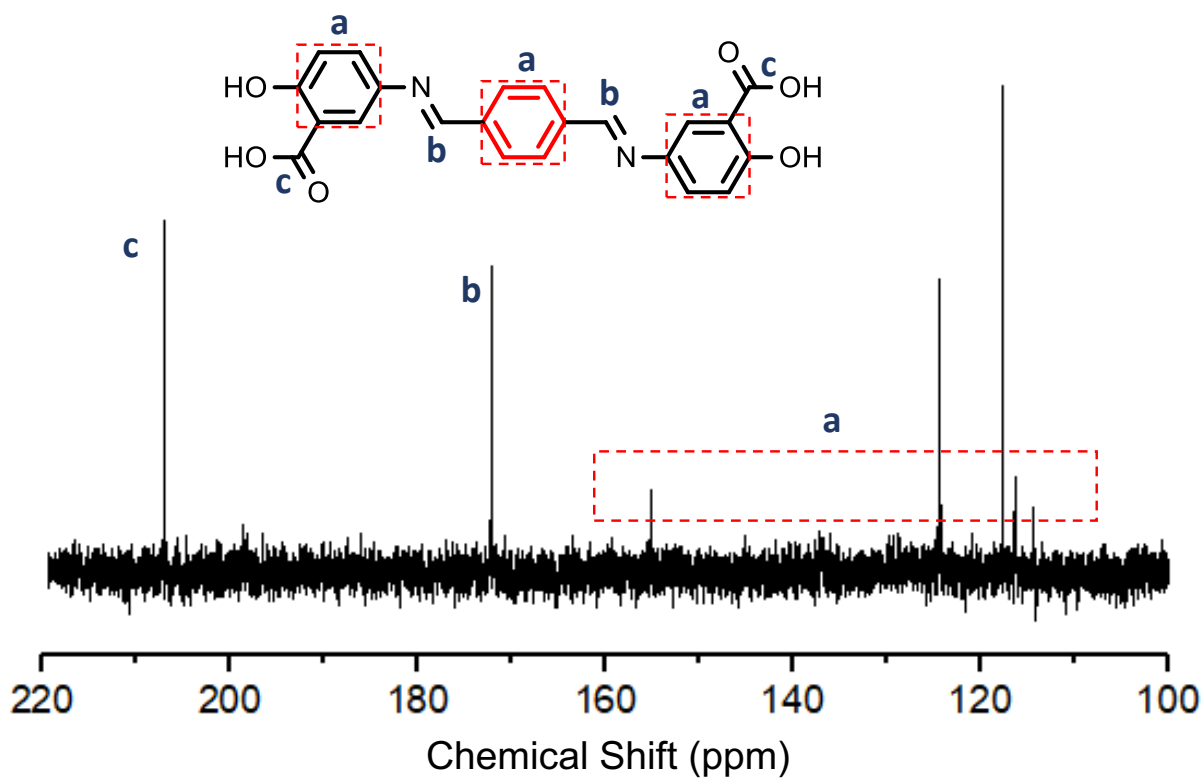

**Figure S2.**  $^{13}\text{C}$  NMR spectrum of **H<sub>4</sub>STL** (DMSO- $d_6$ , 400 MHz)

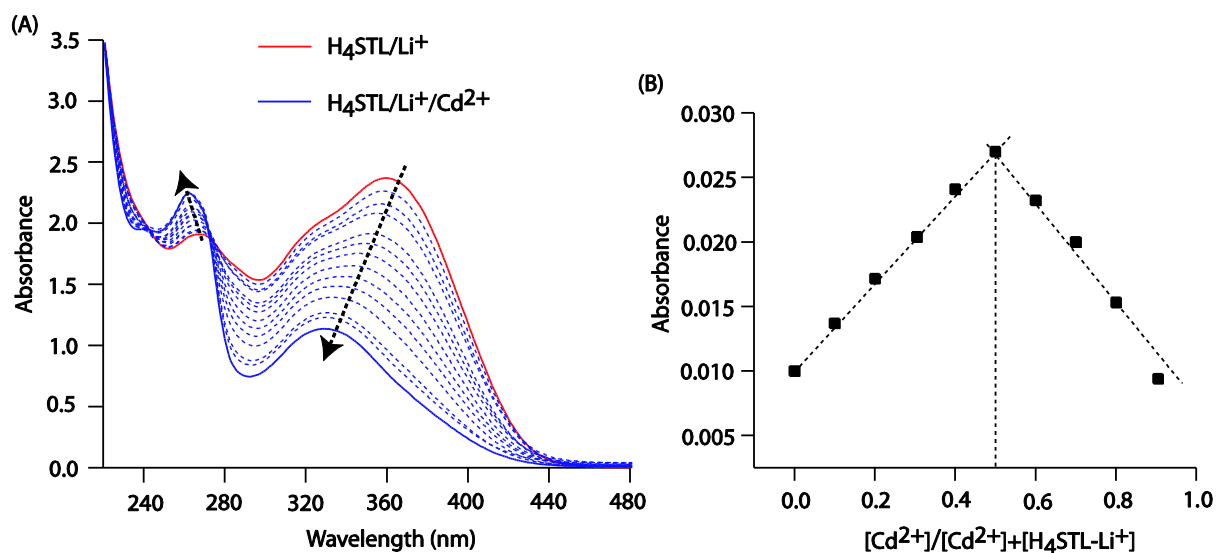

**Figure S3.** (A) UV-vis titration spectra of **H<sub>4</sub>STL**/  $\text{Li}^+$  ( $1 \times 10^{-4}$  M,  $\text{H}_2\text{O}$ , red line) vs  $\text{Cd}^{2+}$  ( $1 \times 10^{-2}$  M,  $\text{H}_2\text{O}$ , blue lines) shows isosbestic point at 273 nm which suggests the formation of complex **H<sub>4</sub>STL**/  $\text{Li}^+$ /  $\text{Cd}^{2+}$  (B) Job's plot for the 1:1 (Ligand: Metal) complex observed at 460 nm in  $\text{H}_2\text{O}$ .

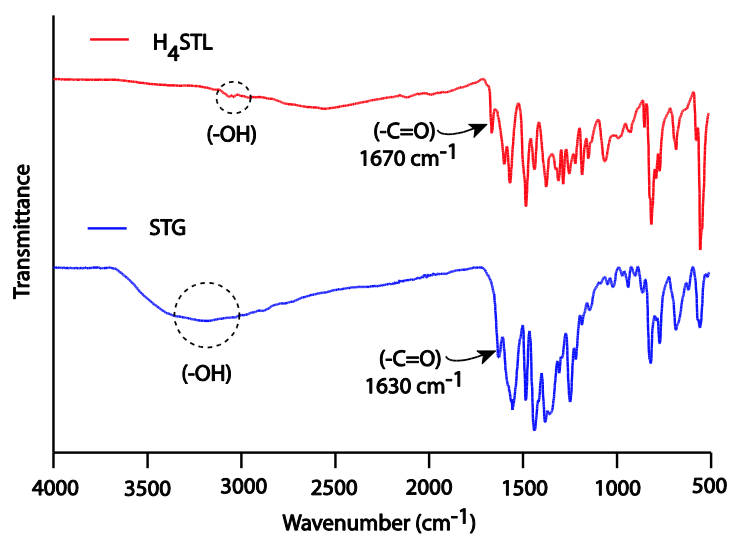

**Figure S4.** FT-IR spectrum of  $\text{H}_4\text{STL}$  gelator (red) shows  $\nu(-\text{OH})$  at 3063  $\text{cm}^{-1}$ ,  $\nu(-\text{C}=\text{O})$  at 1670, 1602  $\text{cm}^{-1}$  and  $\nu(-\text{C}=\text{N})$  at 1572  $\text{cm}^{-1}$ . FT-IR spectrum of STG xerogel shows  $\nu(-\text{OH})$  at 3233  $\text{cm}^{-1}$ ,  $\nu(-\text{C}=\text{O})$  at 1630, 1567  $\text{cm}^{-1}$  and  $\nu(-\text{C}=\text{N})$  at 1557  $\text{cm}^{-1}$ .

**Note:** Broadening of  $-\text{OH}$  band in the FT-IR spectrum of STG suggests the involvement of  $\text{H}_2\text{O}$  in the coordination complexes, in turn, formation of gel.

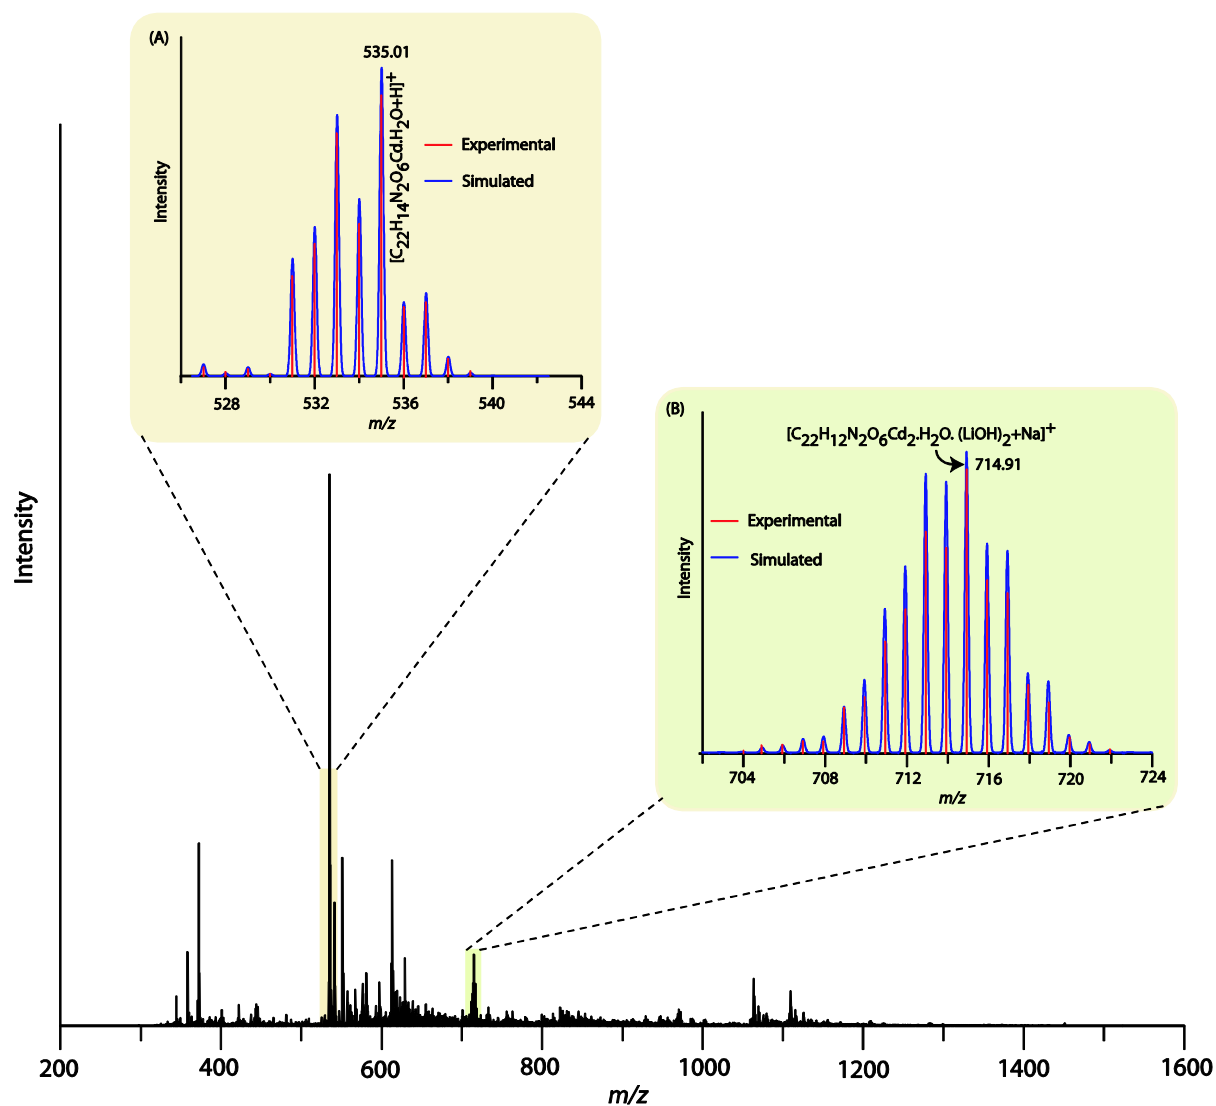

**Figure S5.** ESI-MS spectra of diluted STG: Isotopic abundance patterns corresponding to the molecular ion species (A)  $[C_{22}H_{14}N_2O_6CdH_2O+H]^+$ , (B)  $[C_{22}H_{12}N_2O_6Cd_2\bullet H_2O\bullet (LiOH)_2+Na]^+$ .

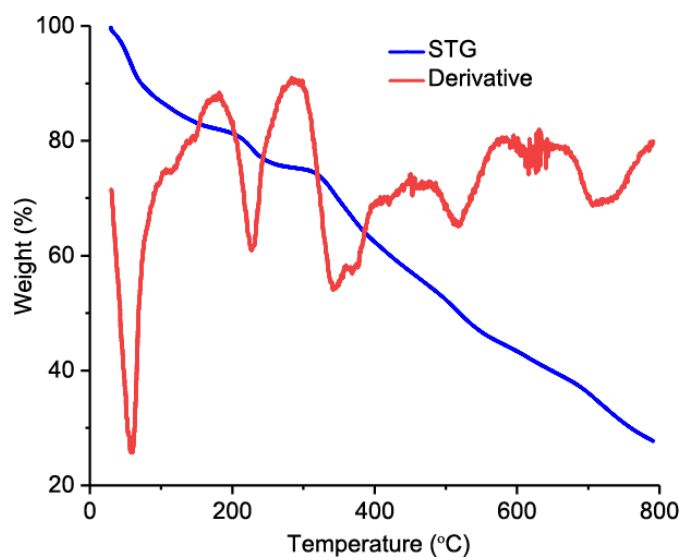

**Figure S6.** Thermo gravimetric analysis for STG xerogel along with derivative plot.

**Note:** The weight loss of **STG** xerogel within the temperature range of 30-300 °C is 25%. The weight loss in this temperature range is due to the removal of free and bound water molecules from the xerogel. Notably, initial weight loss of 13% up to applied temperature 100 °C is accredited to the removal of free water molecules, further weight loss of 12% in the temperature range 100-300 °C is due to removal of bound water molecules thus indicating the coordination of water molecule to the  $\text{Cd}^{2+}$ .<sup>1</sup>

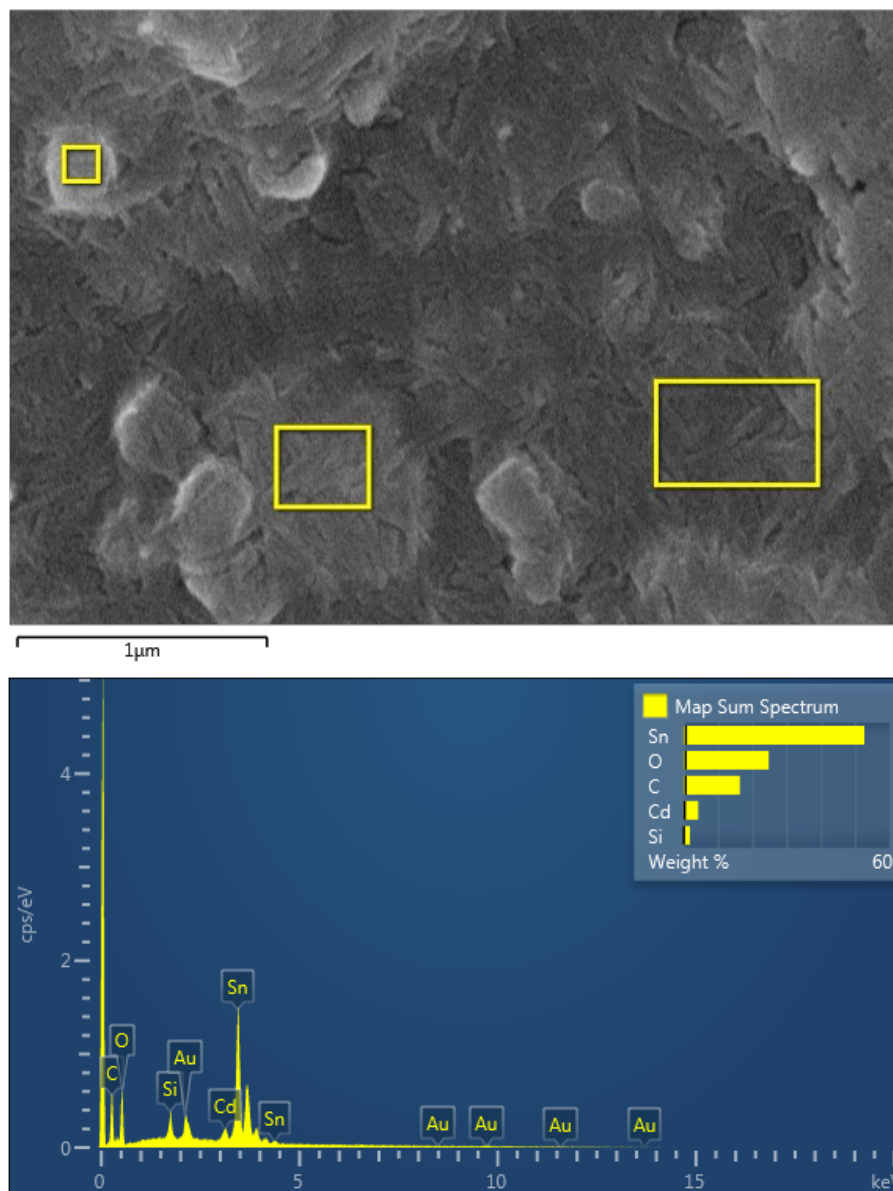

**Figure S7.** EDS spectrum of **STG** xerogel showing presence of O, C and Cd elements.

**Note:** Sn and Si appeared because **STG** xerogel was deposited on FTO glass, while presence of Au is due to gold coating on the sample.

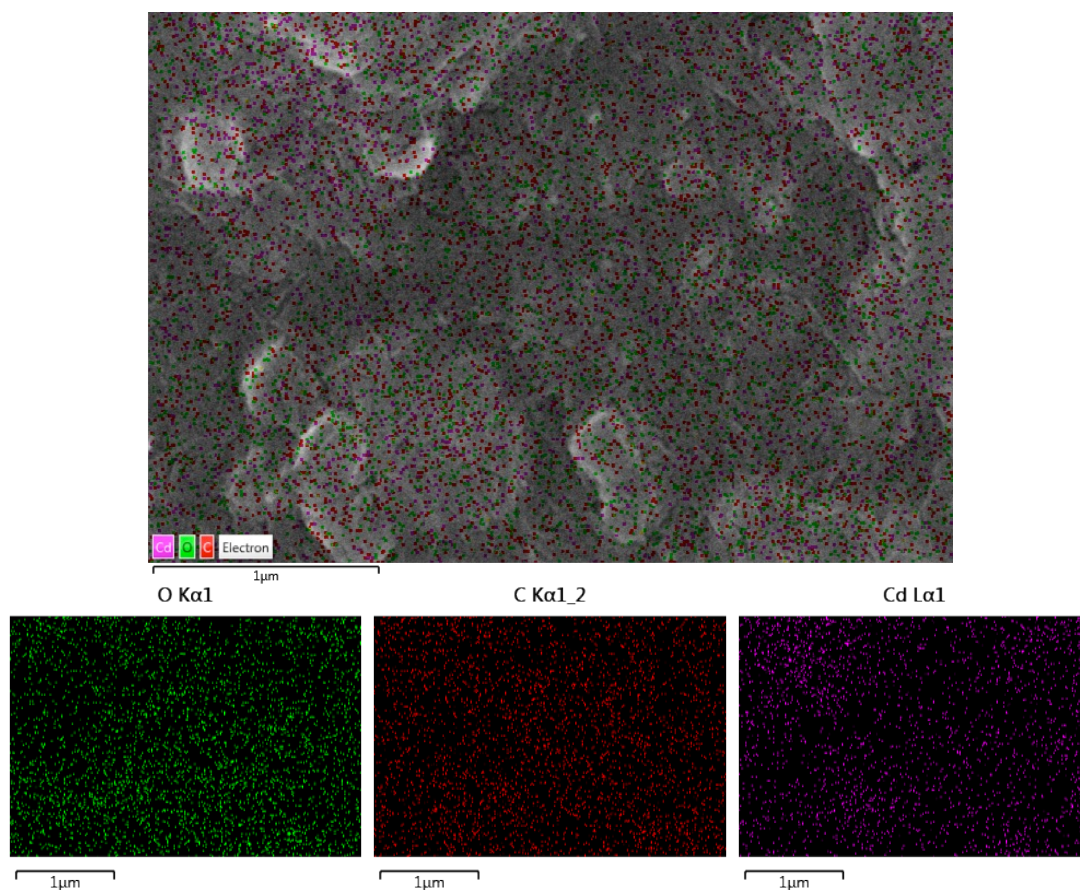

**Figure S8.** EDS elemental mapping of STG xerogel showing uniform distribution of C, O and Cd elements.

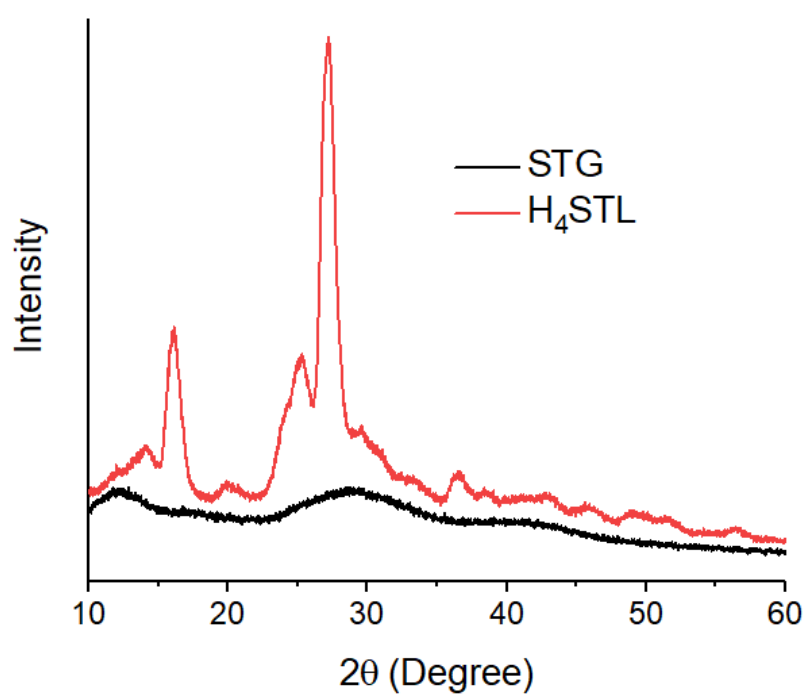

**Figure S9.** Powder XRD patterns of H<sub>4</sub>STL gelator and STG xerogel.

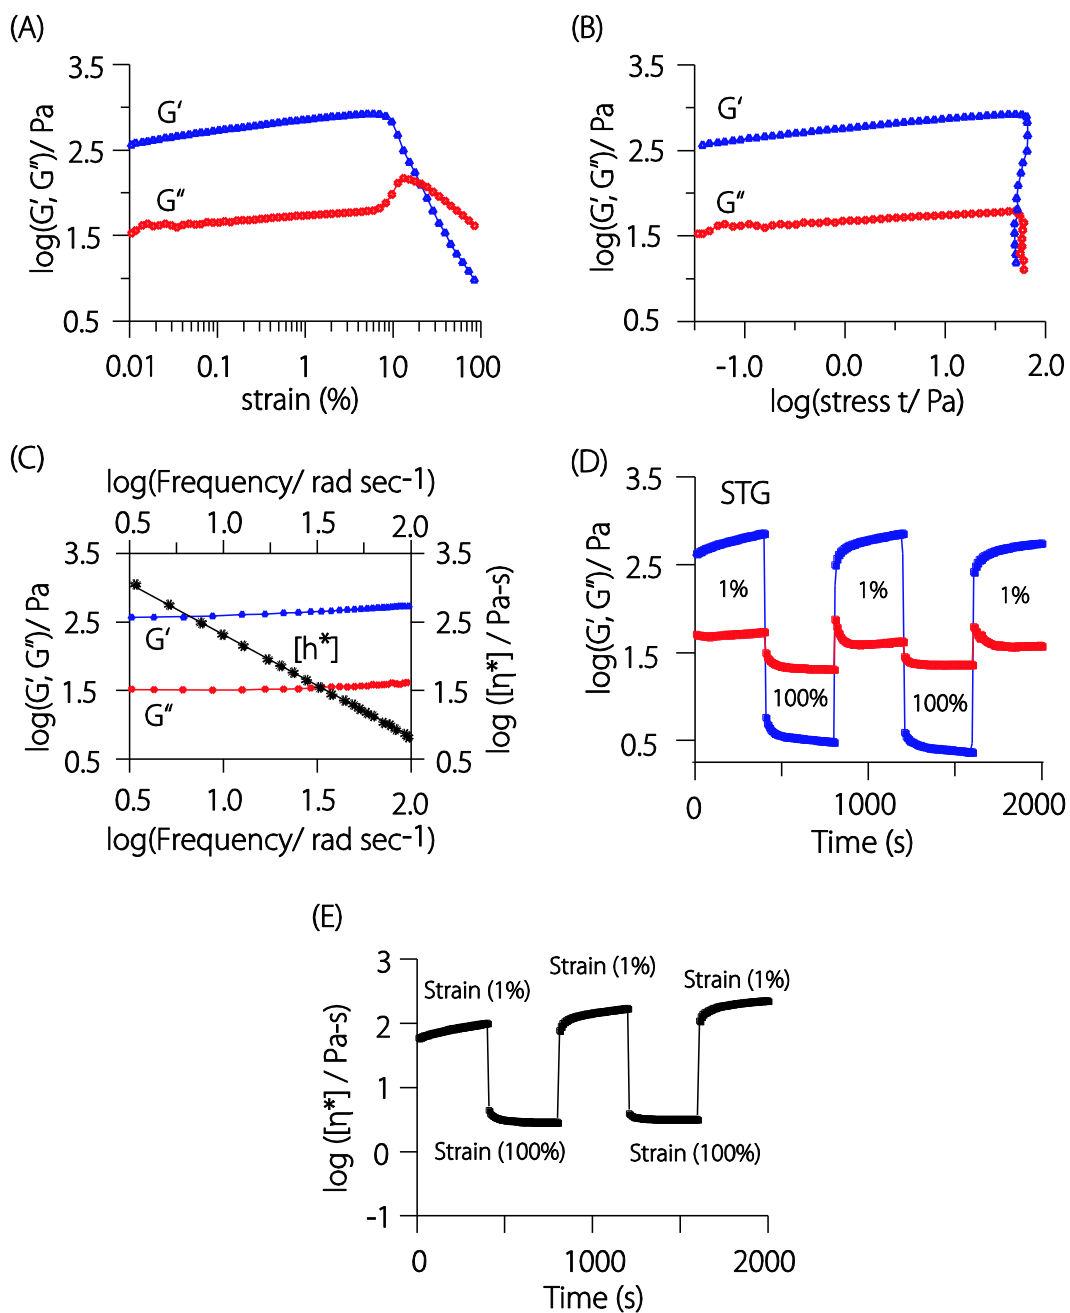

**Figure S10.** Rheological study over freshly prepared STG metallohydrogel (A) Variation in  $G'$  and  $G''$  at a frequency of  $10 \text{ rad s}^{-1}$  and  $25^\circ\text{C}$  under strain sweep, (B) Variation in  $G'$  and  $G''$  at a frequency of  $10 \text{ rad s}^{-1}$  and  $25^\circ\text{C}$  under stress sweep, (C) Variation of  $G'$  and  $G''$  against oscillatory frequency, (D) logarithmic plots of  $G'$ ,  $G''$  vs time at periodic strain of 1% and 100%, (E) logarithmic complex viscosity vs time plot at periodic strain of 1% and 100%.

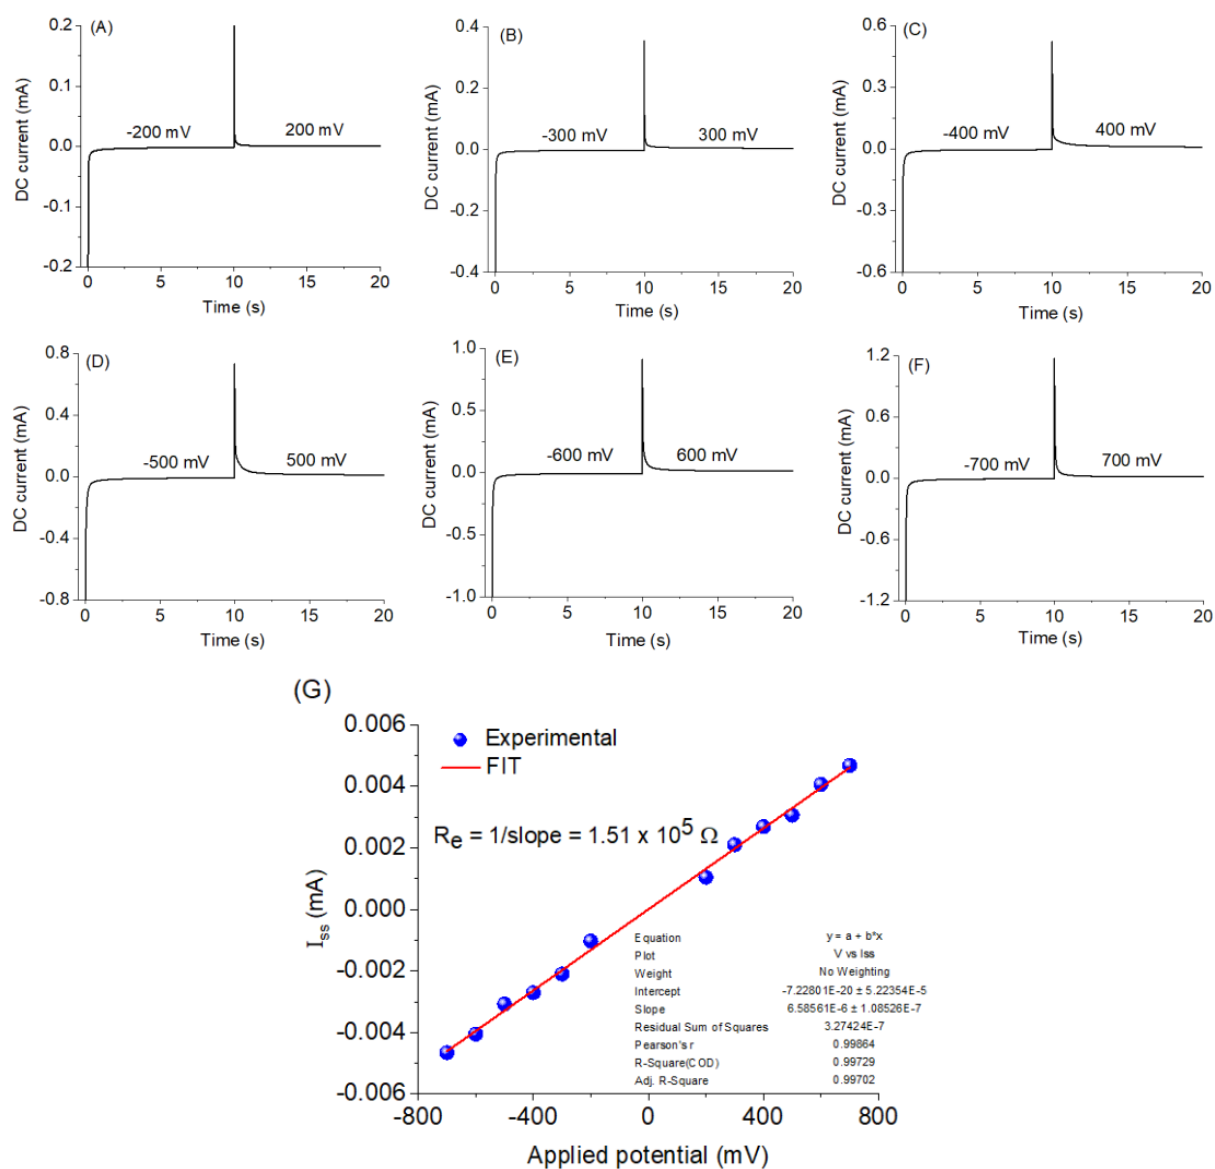

**Figure S11.** (A-F) DC current vs time curves at different applied DC potentials, (G) Steady state current ( $I_{ss}$ ) vs applied potential plot, the experimental data follows Ohm's law.

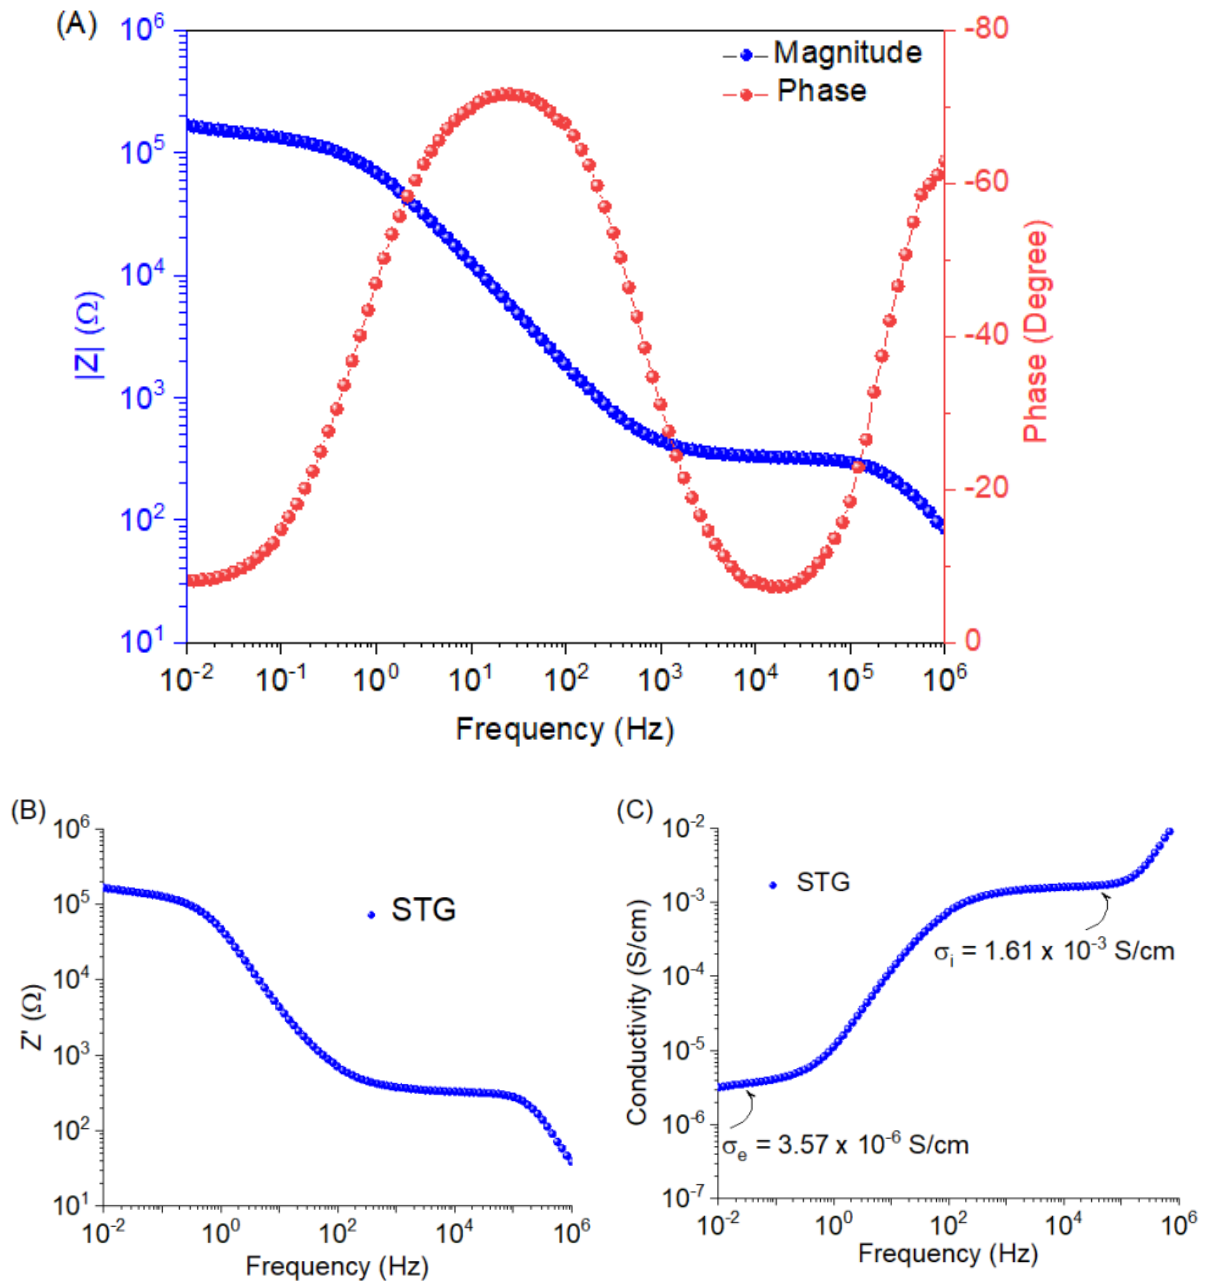

**Figure S12.** (A) Bode impedance plot for STG, left axis: Bode magnitude plot and right axis: Bode phase plot, (B)  $Z'$  vs frequency plot of STG (C) Conductivity vs frequency plot of STG.

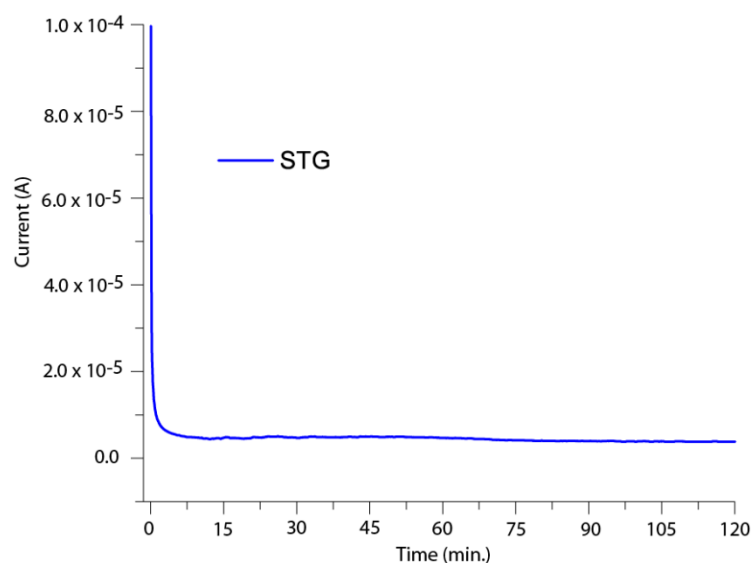

**Figure S13.** D.C. polarization curve of cell: SS|STG|SS with applied step potential of 0.75 V.

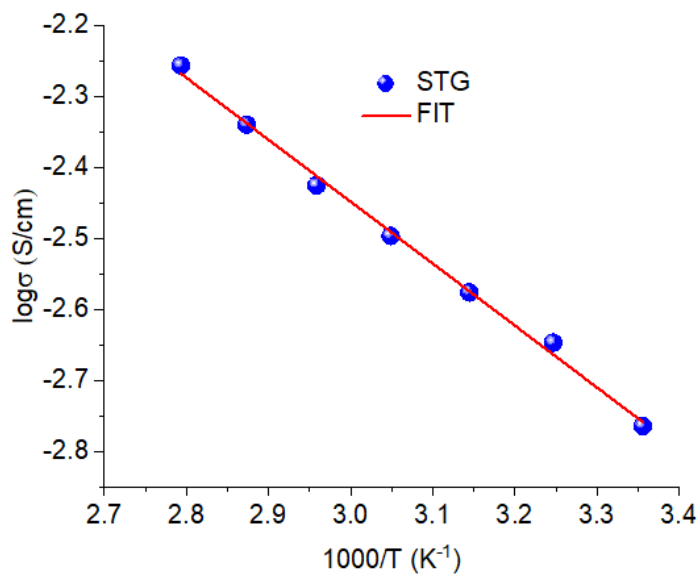

**Figure S14.** Temperature dependent ionic conductivity plot for STG.

**Note-** The conductance of the STG was examined by temperature dependent conductivity measurements between the temperature range 298-358 K. The plot of  $1000/T$  vs  $\log \sigma$  as demonstrated in Fig. S14, the ionic conductivity follows increasing trend with increase in temperature. The enhancement of ionic conductivity is associated with weakening of gel network at higher temperature resulting in the increased mobility of the ionic species within the gel matrix.<sup>4</sup>

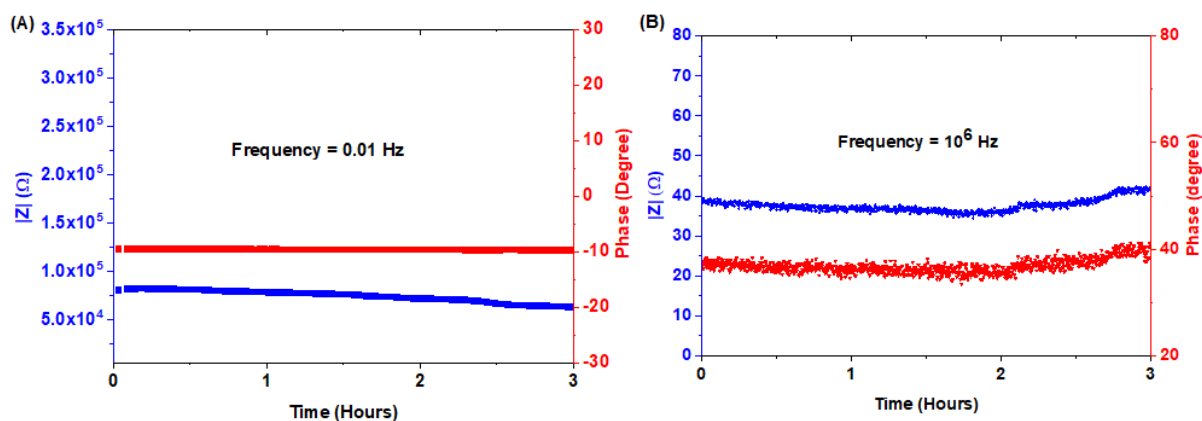

**Figure S15.** (A) Impedance variation with time at 0.01 Hz and (B) impedance variation with time at  $10^6$  Hz.

**Note-** Impedance of STG was monitored for three hours and observed that the impedance showed very slight variation against low and high frequency signal thus revealing electrically stable behaviour of STG.<sup>5</sup>

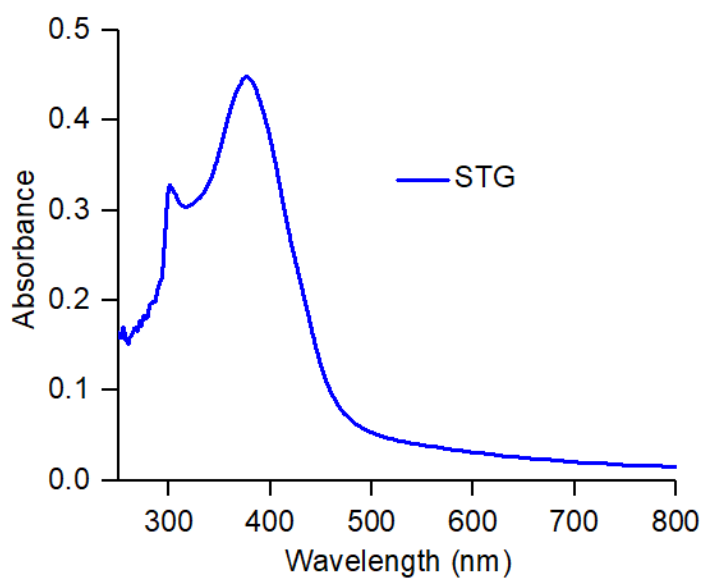

**Figure S16.** UV-Vis spectrum of STG film deposited on FTO glass.

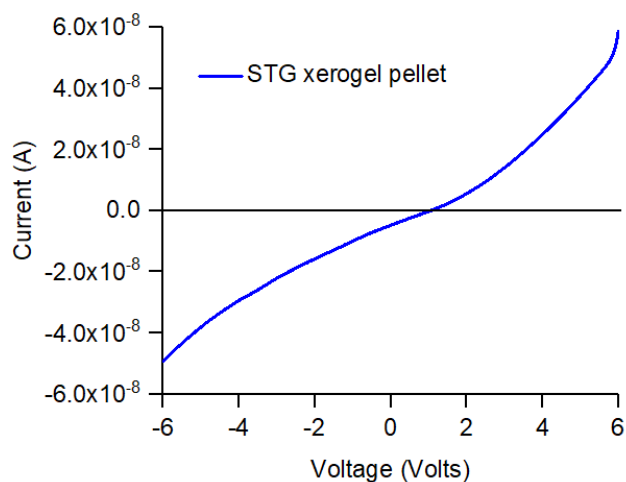

**Figure S17.** Current-voltage (I-V) characteristic of the STG xerogel pellet.

**Note-** The STG xerogel provided very small value of current ( $5.82 \times 10^{-8}$  A) upon application of 6V bias voltage, which is 5 orders less than the current ( $1.5 \times 10^{-3}$  A) obtained for the metallohydrogel.

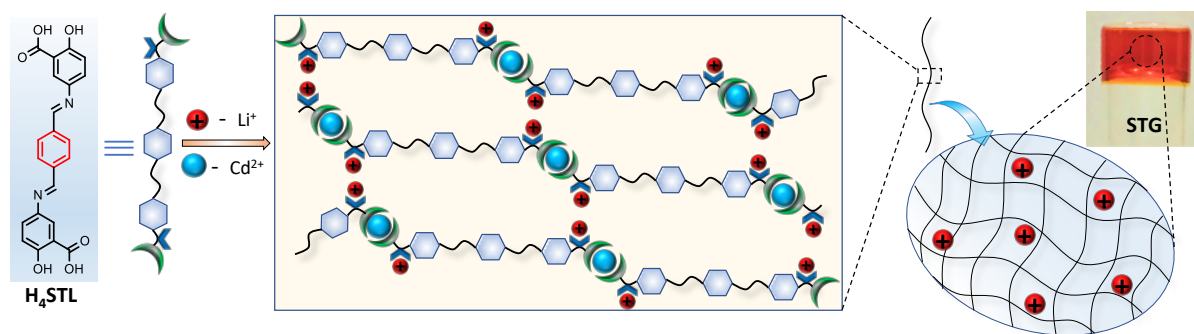

**Figure S18.** Schematic representation of plausible mechanism for gel formation in STG.

## References

1. D. Rawlings et al., *Chem. Mater.*, 2021, **33**(16), 6464.
2. S. N. Patel, A. E. Javier, G. M. Stone, S. A. Mullin and N. P. Balsara, *ACS Nano*, 2012, **6**(2), 1589.
3. K. Nyamayaro, V. Triandafilidi, P. Keyvani, J. Rottler, P. Mehrkhodavandi and S. G. Hatzikiriakos, *Phys. Fluids*, 2021, **33**, 032010.
4. V. K. Pandey, M. K. Dixit, S. Manneville, C. Bucher and M. Dubey, *J. Mater. Chem. A*, 2017, **5**, 6211.
5. Y. Kumar, C. Mahendar, A. Kalam and M. Dubey, *Sustainable Energy Fuels*, 2021, **5**, 1708.
6. M. N. Chaur, D. Collado and J. M. Lehn, *Chem. Eur. J.*, 2011, **17**, 248.
